# Supplementary material for: A single source-precursor route for the one-pot synthesis of highly luminescent CdS quantum dots as ultra-sensitive and selective photoluminescence sensor for Co2+and Ni2+ions
Source: Royal Society of Chemistry journal article supplement (doi:10.1039/c4tc00887a), 2014-06-04
Supplement: c4tc00887a1.pdf [file c4tc00887a1.pdf]

1  
2  
3  
4  
5  
6  
7  
8  
9  
10  
11  
12  
13  
14  
15  
16  
17  
18  
19  
20  
21  
22  
23  
24  
25

Supporting Information For

**Single source precursor route for the one-pot synthesis of highly luminescent CdS quantum dots as ultra-sensitive and selective photoluminescence sensor for Co<sup>2+</sup> and Ni<sup>2+</sup> ions**

**Niharendu Mahapatra<sup>a</sup>, Sudipta Panja<sup>a</sup>, Abhijit Mandal<sup>\*b</sup> and Mintu Halder<sup>\*a</sup>**

<sup>a</sup> Department of Chemistry, Indian Institute of Technology Kharagpur, Kharagpur 721302, India. E-mail: [mintu@chem.iitkgp.ernet.in](mailto:mintu@chem.iitkgp.ernet.in)

<sup>b</sup> Dept. of Chemistry & Environment, Heritage Institute of Technology, Kolkata 700107, India. E-mail: [pcam2008@gmail.com](mailto:pcam2008@gmail.com)

## 26 Supporting Information S1

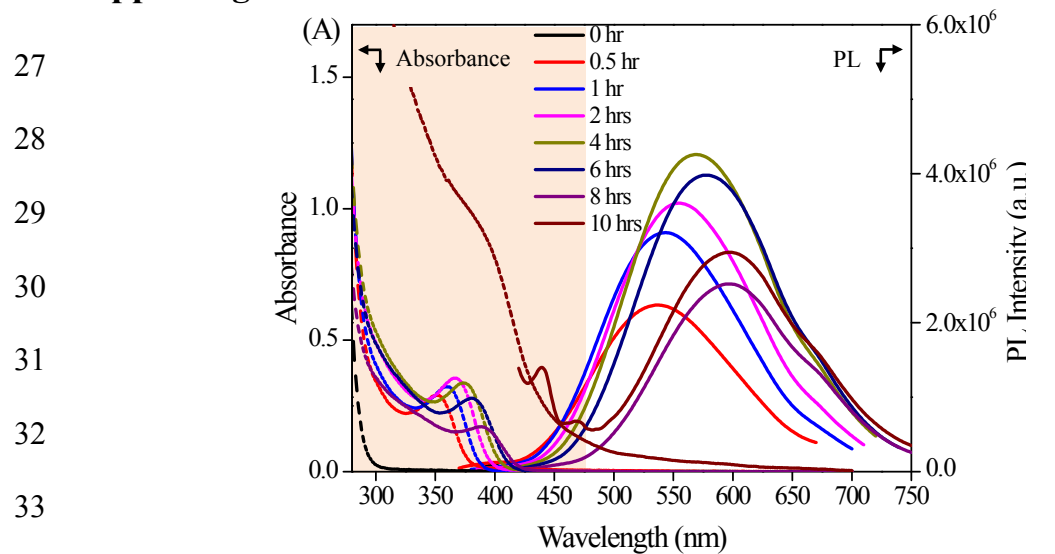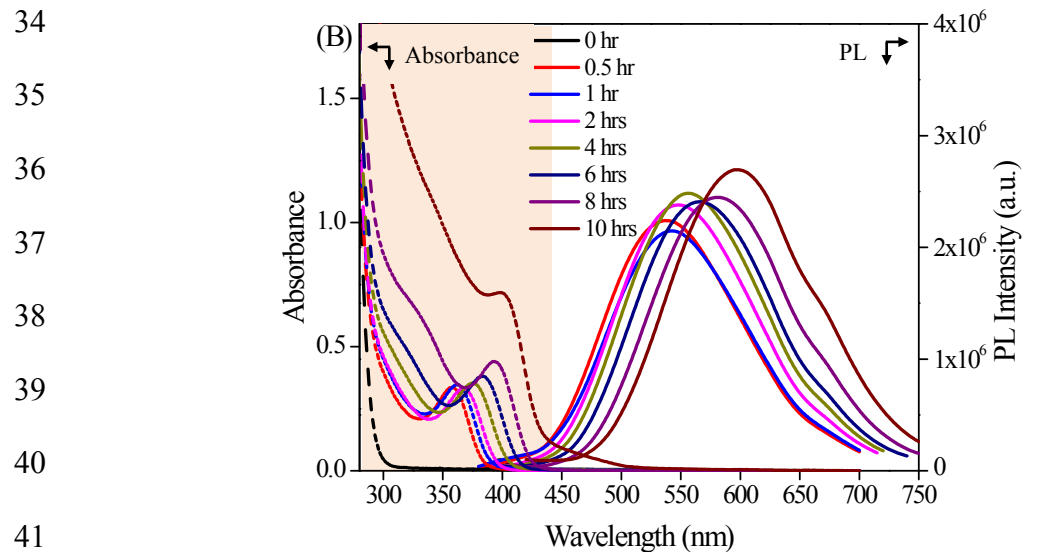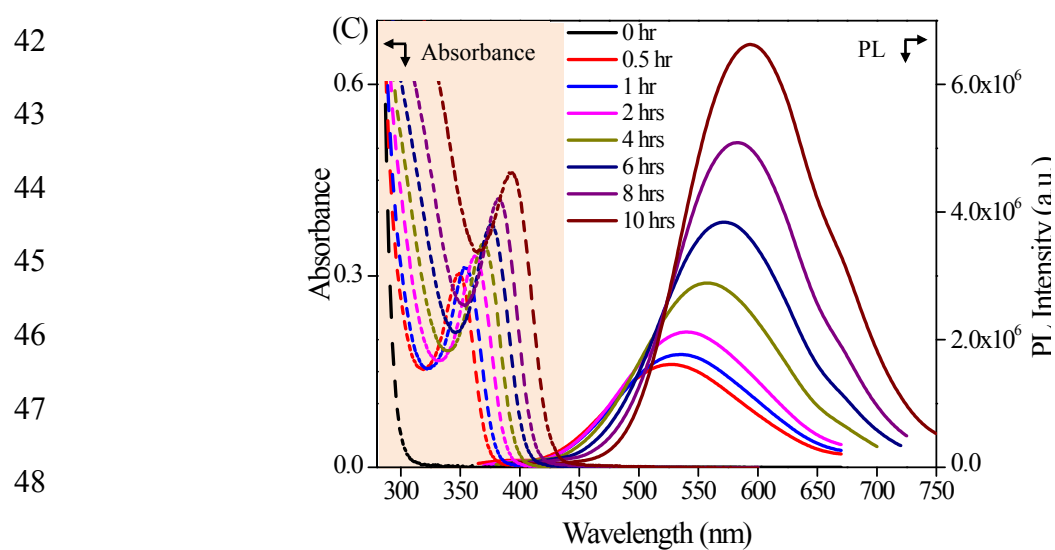

49

50

51

52

53

54

55

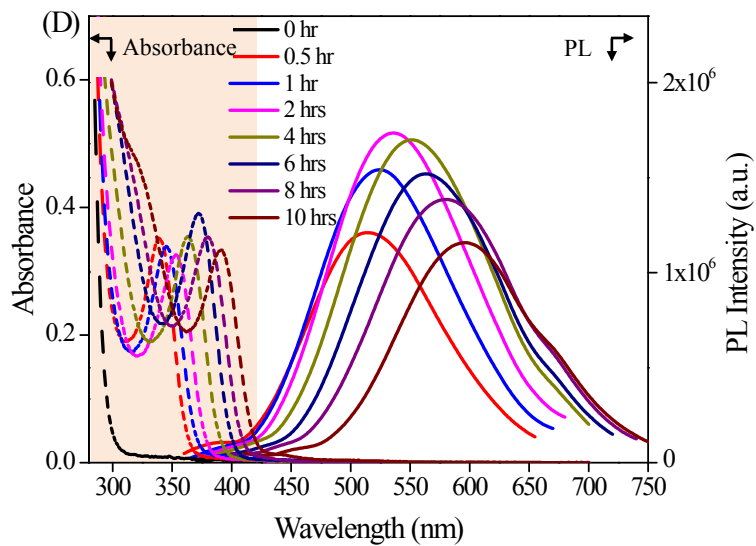

56

57

58

59

60

61

62

63

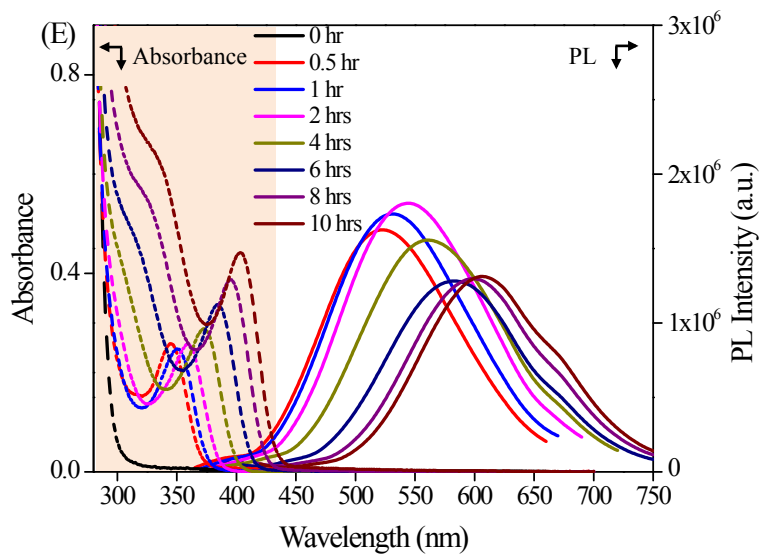

64

65

66

67

68

69

70

71

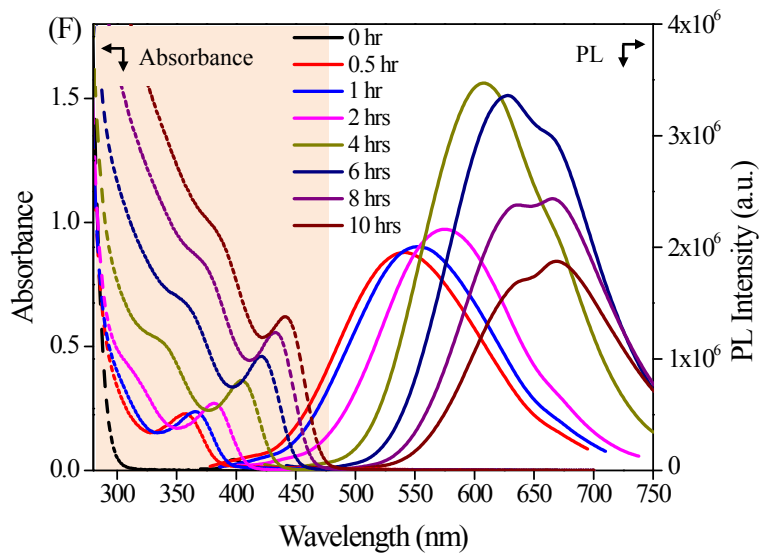

72 **Figure S1.** Absorbance (dotted line) and photoluminescence (solid line) spectra of MPA-CdS  
73 QDs formed by using a concentration ratio of  $[CdCl_2] : [MPA] = 1 : 2.4$  (where  $[CdCl_2] =$   
74  $2.35mM$ ) at various reflux time for (A) pH 7, (B) pH 8, (C) pH 9, (D) pH 10, (E) pH 11, (F) pH  
75 12. Excitation wavelength for the PL spectra is the corresponding absorption peak position  
76 ( $\lambda_{abs}^{max}$ ).

77

## 78 Supporting Information S2

79

80

81

82

83

84

85

86

87

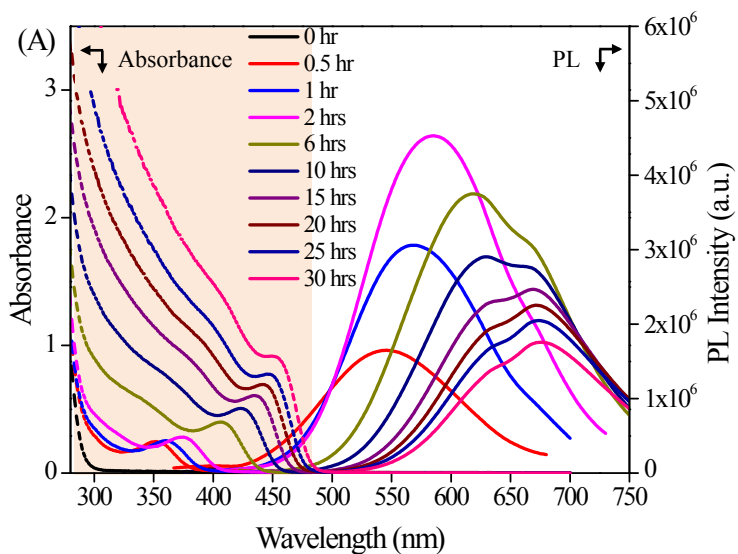

88

89

90

91

92

93

94

95

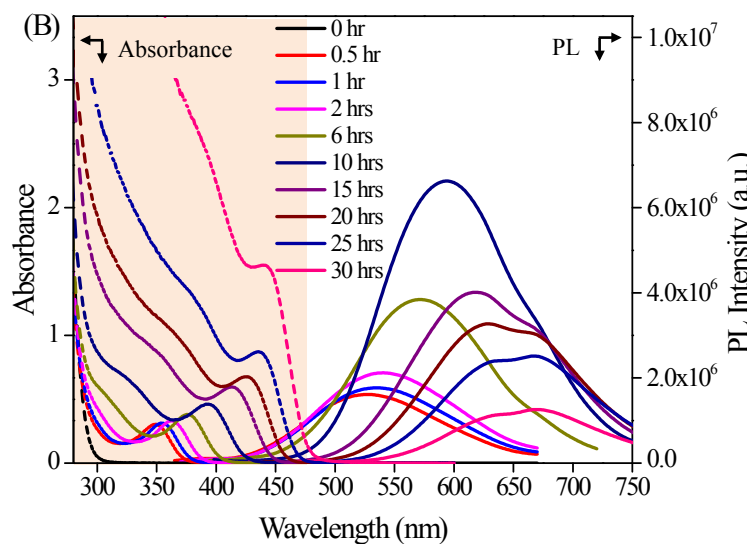

96  
97  
98  
99  
100  
101  
102  
103  
104  
105  
106  
107  
108  
109  
110  
111  
112  
113  
114  
115  
116  
117  
118

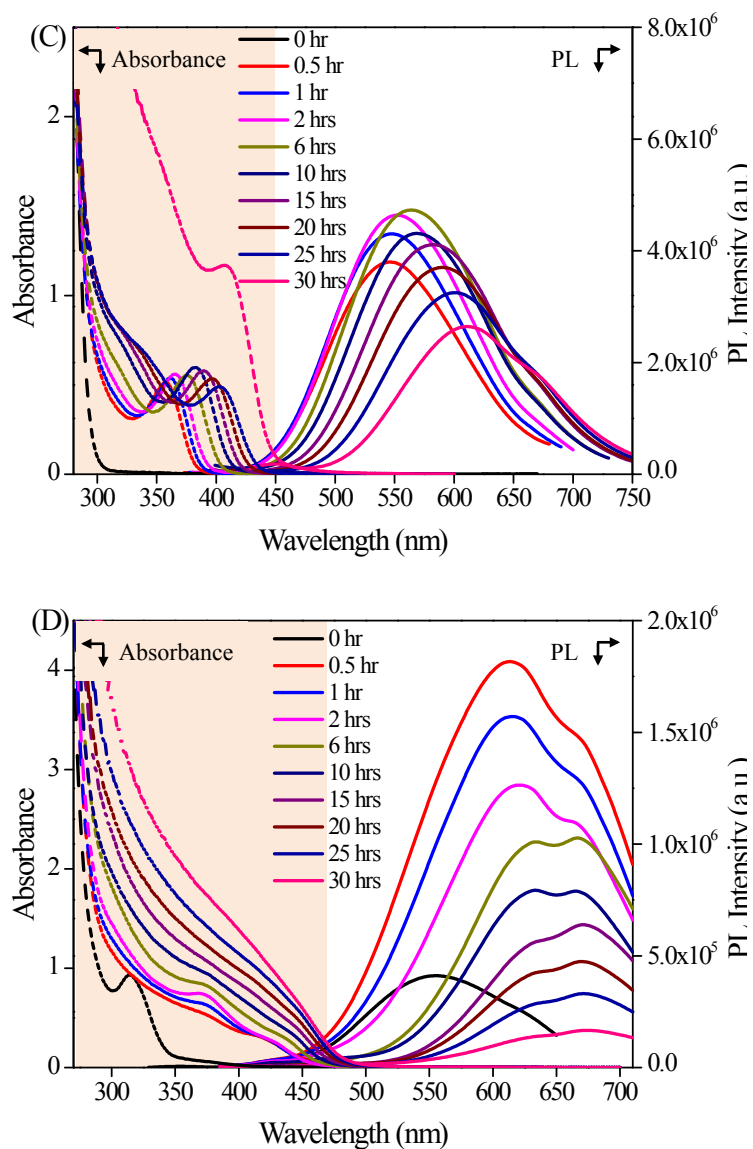

**Figure S2.** Absorbance (dotted line) and photoluminescence (solid line) spectra of MPA-CdS QDs formed by using different concentration ratios of  $[CdCl_2] : [MPA]$ ; (A) 1 : 1.5, (B) 1 : 2.4, (C) 1 : 4.0 and (D) 1 : 8.0 (where  $[CdCl_2] = 2.35mM$ ) at pH 9 with various reflux time. Excitation wavelength for the PL spectra is the corresponding absorption peak position ( $\lambda_{abs}^{max}$ ).

119 **Supporting Information S3**

120 **Table S1.** Comparison of the previously literature reported methods and our method for  
 121 synthesis of CdS QDs.

| <b>Cd Source</b>                                                      | <b>Sulfur Source</b>               | <b>Reaction Conditions</b>                         | <b>Water Solubility</b> | <b>Refs.</b>     |
|-----------------------------------------------------------------------|------------------------------------|----------------------------------------------------|-------------------------|------------------|
| Cd(NO <sub>3</sub> ) <sub>2</sub>                                     | Thioacetamide                      | Ethylene glycol, heating                           | Yes                     | 14               |
| Cd(NO <sub>3</sub> ) <sub>2</sub>                                     | C <sub>13</sub> H <sub>11</sub> NS | Propylene glycol, heating                          | No                      | 18               |
| CdCl <sub>2</sub>                                                     | Thiourea                           | Heating                                            | Yes                     | 24               |
| CdO                                                                   | S                                  | 1-octadecene and oleic acid, microwave irradiation | No                      | 17               |
| Cd(NO <sub>3</sub> ) <sub>2</sub>                                     | Na <sub>2</sub> S                  | AOT/diethyl ether/H <sub>2</sub> O                 | No                      | 20               |
| Cd(OAc) <sub>2</sub>                                                  | Na <sub>2</sub> S                  | DMF/H <sub>2</sub> O, heating                      | Yes                     | 22               |
| Cd(NO <sub>3</sub> ) <sub>2</sub>                                     | Na <sub>2</sub> S                  | R. T. <sup>#</sup>                                 | Yes                     | 23               |
| CdCl <sub>2</sub>                                                     | Na <sub>2</sub> S                  | R. T.                                              | Yes                     | 25               |
| CdCl <sub>2</sub>                                                     | Na <sub>2</sub> S                  | R. T.                                              | Yes                     | 26               |
| CdCl <sub>2</sub>                                                     | Na <sub>2</sub> S                  | Na <sub>3</sub> PO <sub>4</sub> , heating          | No                      | 19               |
| Cd(ClO <sub>4</sub> ) <sub>2</sub>                                    | Na <sub>2</sub> S                  | R. T.                                              | Yes                     | 27               |
| bis[ <i>N,N</i> -diethyl- <i>N'</i> -(benzoylthioureato)] cadmium(II) |                                    | HDA, heating                                       | No                      | 15               |
| Cd-thiosemicarbazide                                                  |                                    | Heating                                            | No                      | 16               |
| <b>CdCl<sub>2</sub></b>                                               | <b>MPA</b>                         | <b>Heating</b>                                     | <b>Yes</b>              | <b>This work</b> |

122

123 <sup>#</sup> R. T. – Room temperature

124

125

126

127

128 **Supporting Information S4**

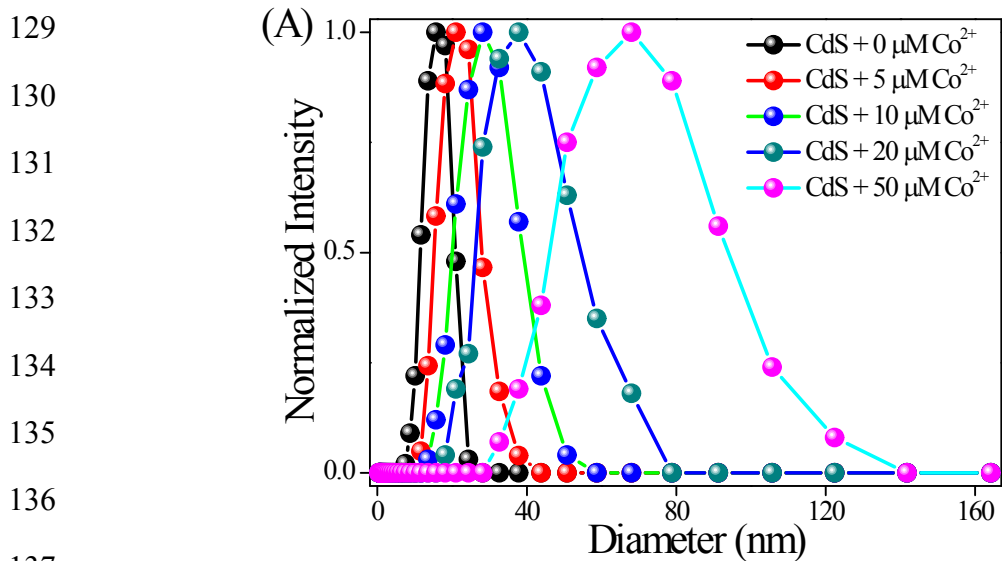

137

138

139

140

141

142

143

144

145

146

147

148

149

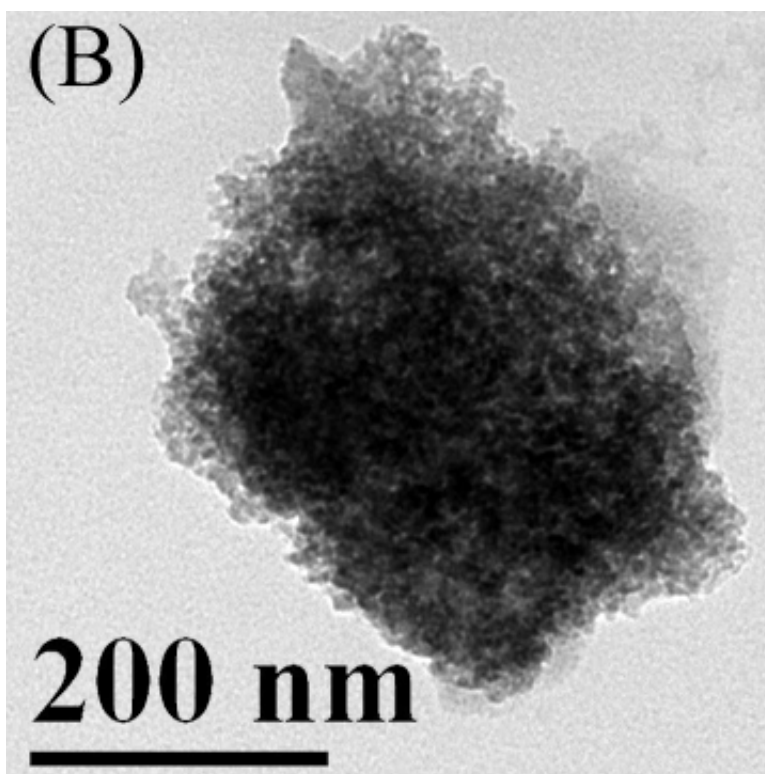

150

151 **Figure S3.** (A) DLS spectra of MPA-CdS QDs in presence of various concentration of  $\text{Co}^{2+}$  (as

152 indicated) and (B) TEM image of MPA-CdS QDs in presence of 50  $\mu\text{M}$   $\text{Co}^{2+}$ .
